# Supplementary material
Source: PubMed Central journal article supplement (PMC7270143)
Supplement: NIHMS1579732-supplement-1.pdf [file NIHMS1579732-supplement-1.pdf]

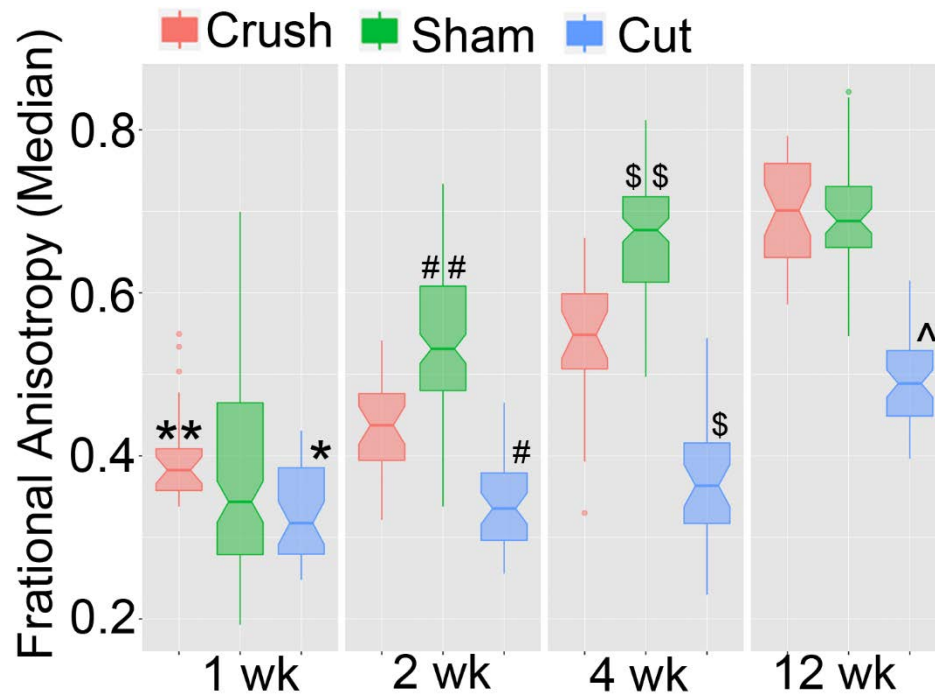

**Supplemental content 1.** See Figure, which shows the Median fractional anisotropy (FA) of procedure groups at all time points. Sham (green), crush (red), and cut/repair (blue). At week 1, all three groups had the same values of fractional anisotropy. As time progressed, there was an increase in fractional anisotropy in all groups, which was more noticeable in the sham and crush groups as early as 2 weeks. At week 2 and 4, sham was higher than crush,  $p < 0.05$  (##,\$\$). Cut/repair group differed from both sham and crush at all time points,  $p < 0.05$  (\*, #, \$, ^) and was not able to reach baseline values at 12 weeks.
